# Supplementary material for: Molecular Study of Pneumocystis jirovecii in Respiratory Samples of HIV Patients in Chile
Source: MDPI journal article supplement (doi:10.3390/jof10020117), 2024-01-31
Supplement: s1 [file s1]

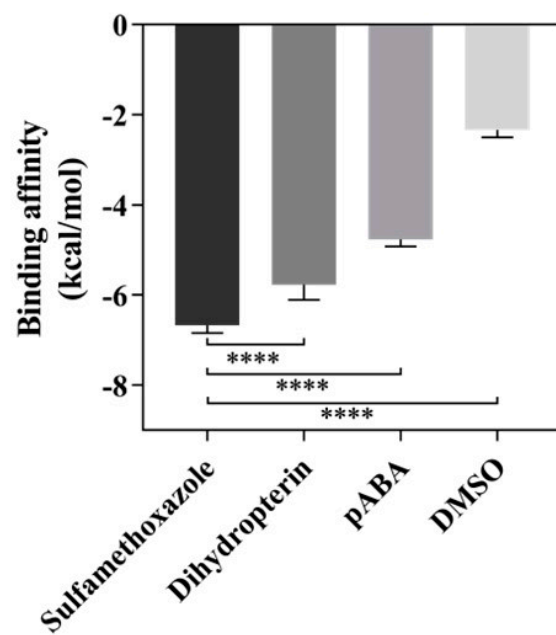

**Figure S1.** Docking analyses involving the wild type enzyme model of dihydropteroate synthase with sulfamethoxazole, dihydropterin, PABA, and DMSO. Significant differences are indicated by asterisks (\*\*\*\*), which denote the level of significance ( $p < 0.05$ ).
